# Supplementary material
Source: publisher site journal article supplement (https://www.dovepress.com/article/236898)
Supplement: Supplementary file 1 [file get_supplementary_file.php]

| **Table S1** Prevalence of *Pfdhfr* and *Pfdhps* Haplotypes by Years | | | | | | | | |
| --- | --- | --- | --- | --- | --- | --- | --- | --- |
| Gene | Haplotype | 2011 | 2012 | 2013 | 2014 | 2016 | 2017 | Total |
| n(%) | n(%) | n(%) | n(%) | n(%) | n(%) | n(%) |
| *Pfdhfr* | NCSI | 3(11.5) |  |  |  |  |  | 3(1.8) |
| (n=162) | ICNI | 1(3.9) | 1(3.9) | 1(3.5) |  |  | 1(3.3) | 4(2.5) |
|  | NRNI |  | 1(3.9) |  |  |  |  | 1(0.6) |
|  | IRNI | 22(84.6) | 24(92.3) | 28(96.6) | 22(100.0) | 29(100.0) | 29(96.7) | 154(95.1) |
| Total | | 26 | 26 | 29 | 22 | 29 | 30 | 162 |
|  |  |  |  |  |  |  |  |  |
| *Pfdhps* | SAKAA | 1(5.9) | 1(4.0) |  | 1(4.8) | 1(3.6) | 1(4.2) | 5(3.6) |
| (n=138) | AAKAA |  | 5(20.0) | 1(4.4) | 1(4.8) | 1(3.6) | 2(8.3) | 10(7.2) |
|  | SGKAA | 12(70.6) | 13(52.0) | 18(78.3) | 14(66.7) | 17(60.7) | 14(58.3) | 88(63.8) |
|  | SAKAS |  | 1(4.0) |  |  |  |  | 1(0.7) |
|  | AGKAA | 4(23.5) | 4(16.0) | 1(4.4) | 3(14.3) | 2(7.1) | 4(16.7) | 18(13.1) |
|  | SGEAA |  |  | 1(4.4) |  | 4(14.3) | 2(8.3) | 7(5.1) |
|  | SGKAS |  |  |  |  |  | 1(4.7) | 1(0.7) |
|  | AGKAS |  | 1(4.0) | 2(8.7) | 2(9.5) | 1(3.6) |  | 6(4.4) |
|  | SGKGS |  |  |  |  | 1(3.6) |  | 1(0.7) |
|  | AGKGS |  |  |  |  | 1(3.6) |  | 1(0.7) |
| Total | | 17 | 25 | 23 | 21 | 28 | 24 | 138 |
| | pfdhps haplotypes | | | pfdhfr haplotypes | | | | | Total | | --- | --- | --- | --- | --- | --- | --- | --- | --- | |  |  |  | Wild type |  | Double mutant | | Triple mutant | | |  |  |  | NCSI n(%) |  | ICNI n(%) | NRNI n(%) | IRNI n(%) |  | | Wild type | SAKAA |  |  |  |  |  | 5(3.9) | 5 | | Single mutant | AAKAA |  |  |  |  |  | 10(7.8) | 10 | |  | SGKAA |  | 3(2.3) |  | 1(0.8) | 1(0.8) | 76(59.4) | 81 | |  | SAKAS |  |  |  |  |  | 1(0.8) | 1 | | Double mutant | AGKAA |  |  |  | 1(0.8) |  | 14(10.9) | 15 | |  | SGEAA |  |  |  |  |  | 7(5.5) | 7 | |  | SGKAS |  |  |  |  |  | 1(0. 8) | 1 | | Triple mutant | AGKAS |  |  |  |  |  | 6(4.7) | 6 | |  | SGKGS |  |  |  |  |  | 1(0.8) | 1 | | Quardruple mutant | AGKGS |  |  |  |  |  | 1(0.8) | 1 | | Total |  |  | 3 |  | 2 | 1 | 122 | 128 | | **NOTE：**The overall numbers(absolute) parasite on the pfdhfr-pfdhps genes in the samples successfully analysed (n=128). | | | | | | | | |   **Table S2** The Pattern of Combined *pfdhfr-pfdhps* Haplotypes | | | | | | | | |
